# Supplementary material for: Effects of tubulin acetylation and tubulin acetyltransferase binding on microtubule structure
Source: PubMed Central journal article supplement — Mol Biol Cell. 2014 Jan 15;25(2):257–66. doi: 10.1091/mbc.E13-07-0387 (PMC3890346; doi:10.1091/mbc.e13-07-0387), 2014-01-15

# Supplemental Materials

*Molecular Biology of the Cell*

Howes et al.

**Figure S1. Modification of tubulin *in vitro*.** **A)** Western blot of tubulin samples used to prepare EM grids after *in vitro* modification with TAT1 probed with an anti-acetylated tubulin antibody (top) and replicated lane stained with SYPRO (middle and bottom). Un = untreated, Ac = acetylated, dAc = deacetylated, Cil = ciliary tubulin. Quantification of Western blot shown below. **B)** Relative signals using different concentrations of TAT1. Western blot and gels same as **A**).

**Figure S2. Refinement of helical parameters.** Estimations for rise (A) and twist (B) of tubulin dimers in 14 protofilament microtubules shown at each iteration of refinement during the reconstruction process of dynamic microtubules assembled from untreated, acetylated and deacetylated tubulin, both in the presence or absence of kinesin.

**Figure S3. Subtilisin digestion cleaves N-terminal loop of  $\alpha$ -tubulin.** Performed microtubules, dynamic (left) and stabilized with taxol (right) were incubated with subtilisin for the time indicated, and then probed with the anti-acetylated tubulin antibody. A decrease in signal at later time points suggests that the N-terminal loop of  $\alpha$ -tubulin is nonspecifically cleaved along with the C-terminal tails.

**Figure S4. TAT1 binding to microtubules decreases with increasing salt.** SDS gel (top) and quantitation (bottom) of pelleting assays showing that TAT1 co-sediments less with microtubules in the presence of increasing KCl. Self-pelleting of TAT1 in the absence of microtubules was subtracted when calculating the fraction bound. Data from three independent co-sedimentation assays. Error bars show standard deviation.

**Figure S5. TAT1 does not oligomerize.** Gel filtration chromatograms at 200 mM and 10 mM KCl showing no change in the elution profile of TAT1.

**Supplemental Table 1. Data summary of reconstructions.** For each microtubule reconstruction, the final parameters and number of microtubule segments that went into the reconstruction are shown. The total number of segments that were boxed from the micrographs and the total number of microtubules are shown in parentheses (segments, microtubules).

|                         |                               |      | Rise  | Twist   | Resolution | Included particles |
|-------------------------|-------------------------------|------|-------|---------|------------|--------------------|
| Dynamic                 | Acetylated<br>(8936, 154)     | 13pf | 9.355 | -27.688 | 8.49       | 3445               |
|                         |                               | 14pf | 8.884 | -25.759 | 10.03      | 3161               |
|                         | Deacetylated<br>(4777, 81)    | 13pf | 9.359 | -27.689 | 8.56       | 2047               |
|                         |                               | 14pf | 8.715 | -25.762 | 8.34       | 2066               |
| Dynamic with<br>kinesin | Acetylated<br>(27933, 1073)   | 13pf | 9.501 | -27.692 | 8.67       | 16273              |
|                         |                               | 14pf | 8.794 | -25.765 | 8.75       | 6658               |
|                         | Deacetylated<br>(23616, 797)  | 13pf | 9.489 | -27.696 | 9.23       | 4346               |
|                         |                               | 14pf | 8.801 | -25.759 | 9.15       | 15717              |
| Taxol with<br>kinesin   | Acetylated<br>(22580,860)     | 13pf | 9.625 | -27.682 | 8.63       | 6394               |
|                         |                               | 14pf | 9.083 | -25.705 | 9.29       | 2837               |
|                         | Deacetylated<br>(25624, 1287) | 13pf | 9.505 | -27.685 | 9.81       | 8001               |
|                         |                               | 14pf | 8.927 | -25.703 | 11.4       | 3133               |

Figure S1

**A**

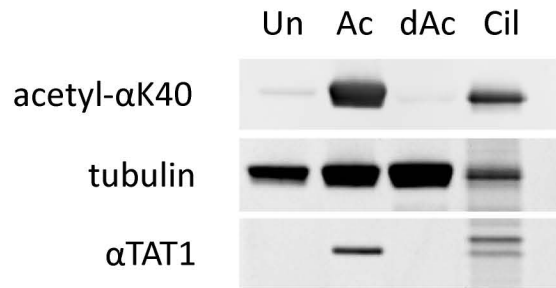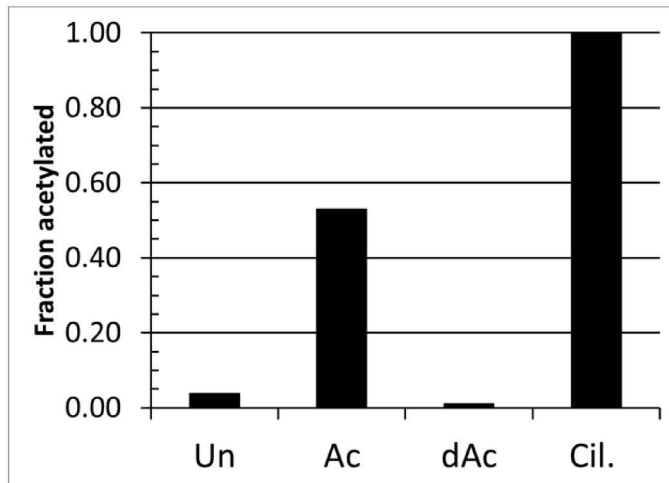

**B**

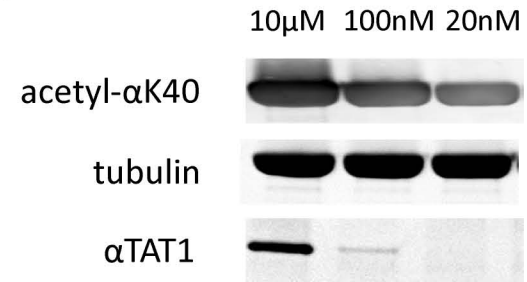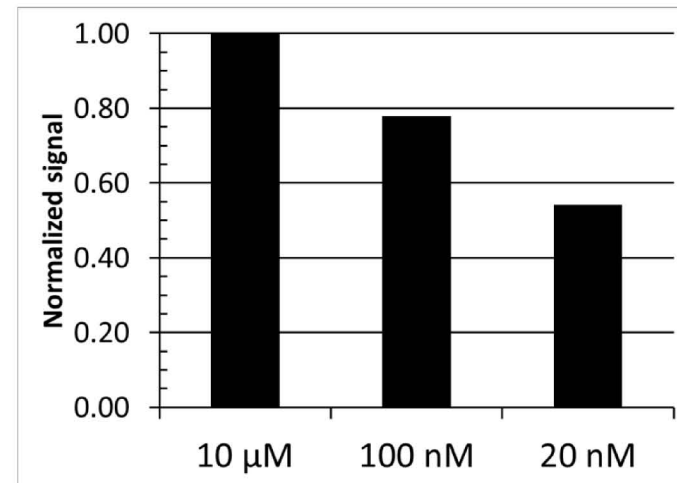

Figure S2

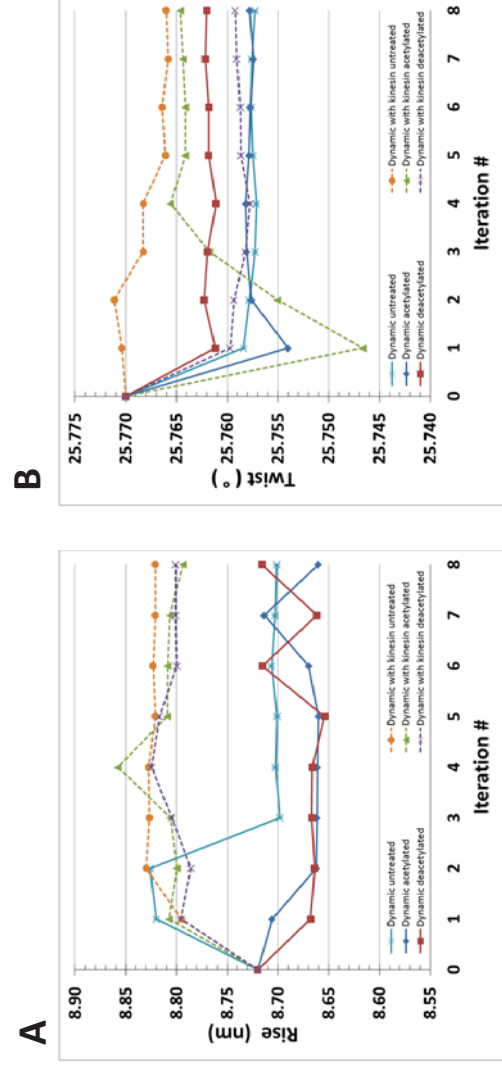

Figure S3

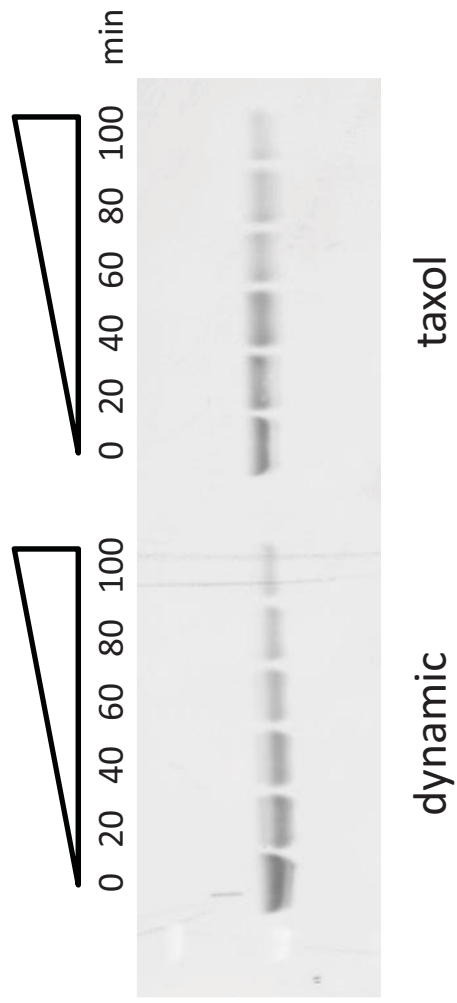

Figure S4

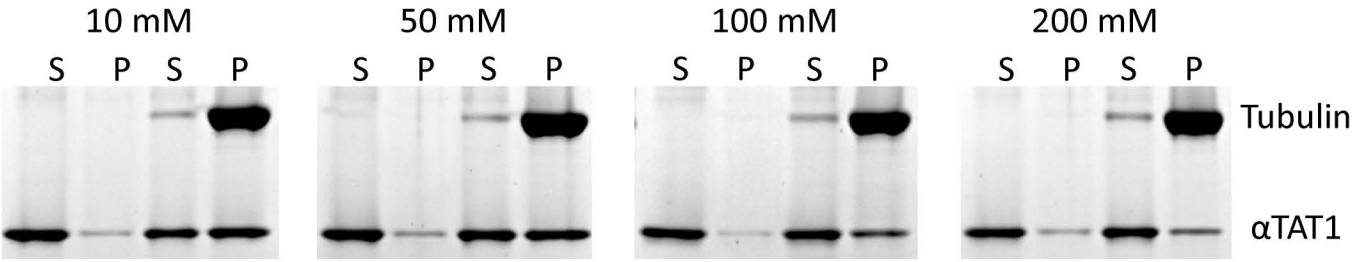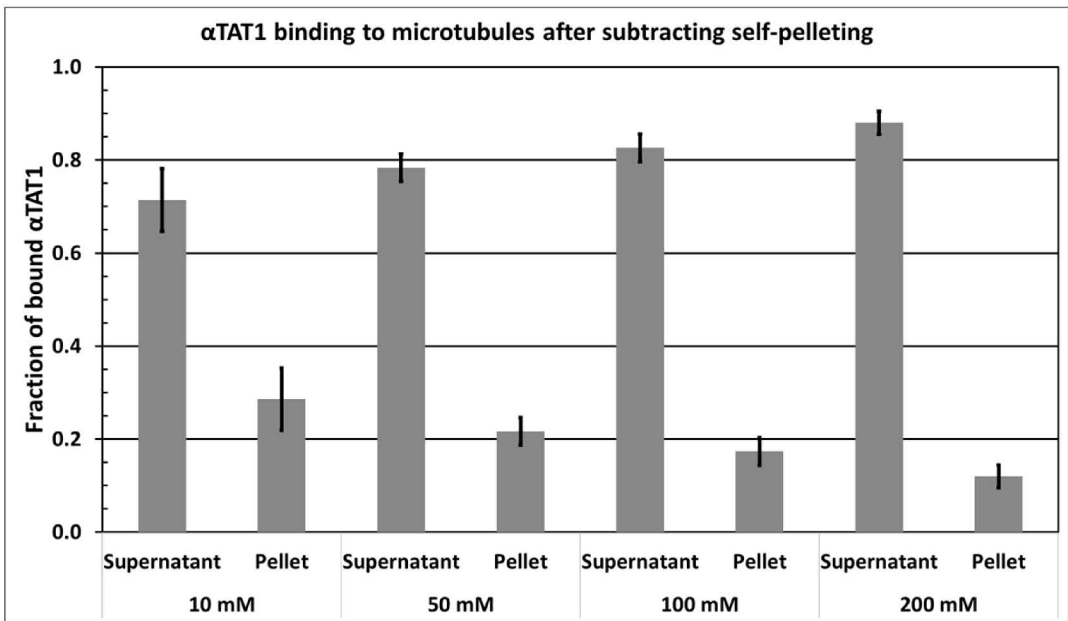

Figure S5

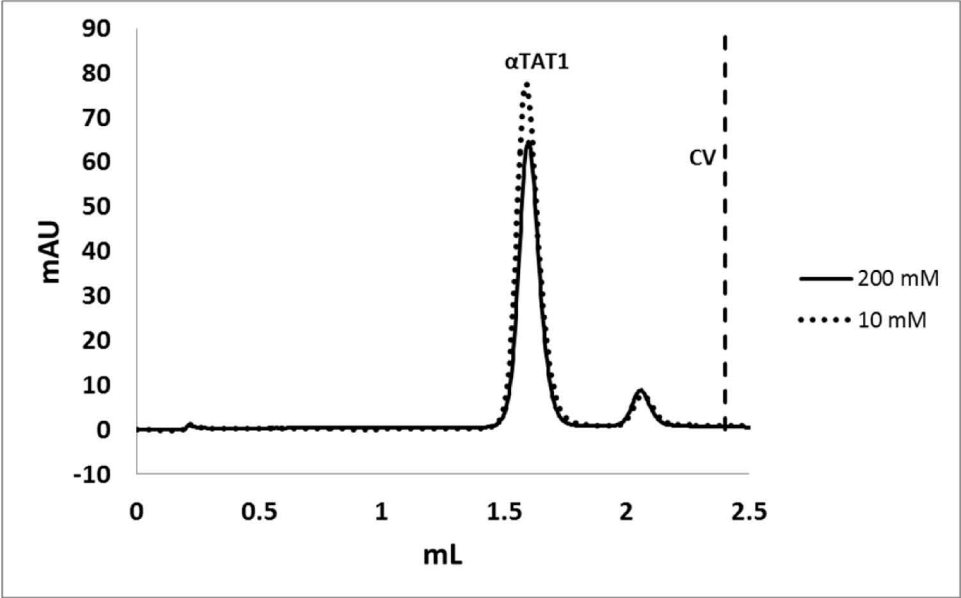

Supplement: supp_E13-07-0387v1_CombinedSupMats.pdf [file supp_E13-07-0387v1_CombinedSupMats.pdf]
